# Supplementary material for: Association of Trace Element Levels with Outcomes in Critically Ill COVID-19 Patients
Source: MDPI journal article supplement (doi:10.3390/nu15153308), 2023-07-26
Supplement: s1 [file s1]

## Supplementary Materials

**Supplementary Table S1. ICP-MS instrument operating conditions.**

| ICP-MS spectrometer                         | Agilent 7800 series                     |
|---------------------------------------------|-----------------------------------------|
| Skimmer and sampler cones                   | Ni                                      |
| Spray chamber                               | temperature stabilized (Peltier cooled) |
| Sample depth                                | 8 mm                                    |
| RF Power                                    | 1550 W                                  |
| Plasma gas flow rate                        | 15 L/min                                |
| Carrier gas flow rate                       | 1.01-1.07 L/min                         |
| He flow rate (KED mode)                     | 4.3 mL/min                              |
| Peristaltic pump tubing                     | inner Ø 1.02 mm, wall thickness 0.85 mm |
| Uptake time and nebulizer pump speed        | 50 s, 0.3 rps                           |
| Stabilization time and nebulizer pump speed | 30 s, 0.1 rps                           |
| Oxyde (CeO/Ce) ratio                        | 0.86-0.99 %                             |
| Doubly charged (Ce) ratio                   | 1.08-1.25 %                             |

**Supplementary Table S2. Trace elements acquisition parameters.**

| Isotope                             | Integration time in KED mode (He) | Internal standard |
|-------------------------------------|-----------------------------------|-------------------|
| <sup>63</sup> Cu                    | 0.5 s                             | Rhodium / Indium  |
| <sup>66</sup> Zn                    | 0.5 s                             | Rhodium / Indium  |
| <sup>78</sup> Se / <sup>82</sup> Se | 0.5 s                             | Rhodium / Indium  |

**Supplementary Table S3. Analytical validation method.**

| CRM                                 | Recipe ClinCkek-Control plasma level I and II |             |                   |                     |
|-------------------------------------|-----------------------------------------------|-------------|-------------------|---------------------|
| Isotope                             | LOD (ng/ml)                                   | LOQ (ng/ml) | Repeatability (%) | Reproducibility (%) |
| <sup>63</sup> Cu                    | 1.15                                          | 3.69        | 1.70              | 3.10                |
| <sup>66</sup> Zn                    | 0.42                                          | 5.54        | 1.20              | 3.90                |
| <sup>78</sup> Se / <sup>82</sup> Se | 0.61                                          | 1.68        | 1.40              | 2.50                |

**Supplementary Table S4. Characteristics of patients by trace elements of ICU patients.**

|                                                          | Normal<br>zinc<br>N=59  | Low zinc<br>N=59     | p     | Normal<br>copper<br>N=59 | Low<br>copper<br>N=59 | p     | Normal<br>selenium<br>N=59 | Low<br>selenium<br>n=59 | p     |
|----------------------------------------------------------|-------------------------|----------------------|-------|--------------------------|-----------------------|-------|----------------------------|-------------------------|-------|
| Sex male, n (%)                                          | 50<br>(84.8%)           | 41 (69.5%)           | 0.049 | 40<br>(67.8%)            | 51 (86.4%)            | 0.02  | 48 (81.4%)                 | 43 (72.9%)              | 0.3   |
| Age, median (IQR)                                        | 62 (54-<br>69)          | 67 (59-76)           | <0.01 | 62 (55-<br>72)           | 66 (57-74)            | 0.2   | 59 (55-69)                 | 68 (61-76)              | <0.01 |
| BMI, median (IQR)                                        | 29.1 (26-<br>32.2)      | 27.5 (25.3-<br>30.5) | 0.1   | 29.1 (26-<br>32.3)       | 27.8 (25.3-<br>31.8)  | 0.2   | 29.1 (26-<br>32.1)         | 27.8 (25.1-<br>31.1)    | 0.08  |
| Any comorbidity, n<br>(%)                                | 44<br>(74.6%)           | 50 (84.8%)           | 0.2   | 47<br>(79.7%)            | 47 (79.7%)            | 0.4   | 45 (76.3%)                 | 49 (83.1%)              | 0.4   |
| SAPSII on ICU<br>admission, median<br>(IQR)              | 50 (35-<br>59)          | 58 (43-69)           | <0.01 | 53 (43-<br>65)           | 50 (35-64)            | 0.3   | 51 (37-60)                 | 57 (43-66)              | 0.2   |
| CRP on ICU<br>admission, median<br>(IQR)                 | 141 (83.9-<br>180.3)    | 181 (123-<br>236)    | <0.01 | 165.7<br>(112-<br>209.1) | 138 (95.3-<br>283.7)  | 0.3   | 128 (81.9-<br>168.1)       | 184.6<br>(123.2-239)    | <0.01 |
| Leucocytes count on<br>ICU admission,<br>median (IQR)    | 6.9 (5.5-<br>10)        | 8.7 (6.2-<br>10.8)   | 0.1   | 8 (6.2-<br>10.7)         | 7.6 (5.2-<br>10.4)    | 0.4   | 6.7 (5.5-<br>9.7)          | 9 (5.9-11.1)            | 0.03  |
| Copper on ICU<br>admission in umol/l,<br>median (IQR)    | 19.1<br>(16.4-<br>21.6) | 17.8 (15.9-<br>19.6) | 0.03  | 20.5<br>(19.3-<br>22.6)  | 16.2 (15-<br>17.3)    | <0.01 | 19.4 (17.4-<br>22.2)       | 17.2 (15.3-<br>18.8)    | <0.01 |
| Zinc on ICU<br>admission in umol/l,<br>median (IQR)      | 9.7 (8.6-<br>11.7)      | 6.9 (6.1-<br>7.6)    | <0.01 | 8.5 (7.3-<br>10.2)       | 7.7 (6.5-9)           | 0.02  | 8.5 (7.4-<br>10.4)         | 7.5 (6.3-9)             | <0.01 |
| Selenium on ICU<br>admission in umol/l,<br>median (IQR)  | 0.9 (0.8-<br>1.1)       | 0.8 (0.7-1)          | <0.01 | 0.9 (0.8-<br>1.1)        | 0.8 (0.7-<br>0.9)     | <0.01 | 1 (0.9-1.1)                | 0.7 (0.7-<br>0.8)       | <0.01 |
| PaO2/FiO2 on ICU<br>admission, median<br>(IQR)           | 19.8<br>(13.7-<br>26.1) | 17.7 (12.4-<br>20.7) | 0.5   | 18.6<br>(13.6-25)        | 18.9 (13.5-<br>21.4)  | 0.9   | 18.2 (13.7-<br>25.7)       | 19 (13-21)              | 0.06  |
| ECMO during ICU<br>stay, n (%)                           | 3 (5%)                  | 7 (11.9%)            | 0.2   | 5 (8.5%)                 | 5 (8.5%)              | 1     | 5 (8.5%)                   | 5 (8.5%)                | 1     |
| Septic shock during<br>ICU stay, n (%)                   | 8 (13.6%)               | 16 (27.1%)           | 0.07  | 9 (15.3%)                | 15 (25.4%)            | 0.3   | 9 (15.3%)                  | 15 (25.4%)              | 0.2   |
| Time under<br>mechanical<br>ventilation, median<br>(IQR) | 13 (8-17)               | 13 (10-19)           | 0.3   | 11 (8-15)                | 15 (11-21)            | <0.01 | 12 (9-15)                  | 13 (8-24)               | 0.09  |
| ICU LOS, median<br>(IQR)                                 | 15 (10-<br>21)          | 16 (11-25)           | 0.5   | 13 (10-<br>20)           | 17 (13-24)            | <0.01 | 15 (11-19)                 | 16 (10-26)              | 0.3   |
| Mortality at day 28,<br>n (%)                            | 5 (8.5%)                | 13 (22%)             | 0.07  | 8 (13.6%)                | 10 (17%)              | 0.8   | 5 (8.5%)                   | 13 (22%)                | 0.04  |

**Supplementary Table S5. Correlation between trace elements levels in ICU patients.**

|          | Zinc                           | Copper                         | Selenium                       |
|----------|--------------------------------|--------------------------------|--------------------------------|
| Zinc     | <b>1</b>                       |                                | <b>0.3</b><br><b>p&lt;0.01</b> |
| Copper   | <b>0.3</b><br><b>p&lt;0.01</b> | <b>1</b>                       |                                |
| Selenium |                                | <b>0.5</b><br><b>p&lt;0.01</b> | <b>1</b>                       |

A Pearson's product-moment correlation was run to assess the relationship between copper, zinc and selenium levels in the 118 ICU patients. There was a moderate correlation between zinc and copper levels ( $r=0.3$ ,  $p<0.01$ ), between copper and selenium levels ( $r=0.5$ ,  $p<0.01$ ) and between selenium and zinc ( $r=0.3$ ,  $p<0.01$ ).
